# Supplementary material
Source: PubMed Central journal article supplement (PMC4813496)
Supplement: 10.1074_M115.702605_jbc.M115.702605-1.pdf [file 10.1074_M115.702605_jbc.M115.702605-1.pdf]

## Supplemental Information

### Dynamic coupling and allosteric networks in the alpha subunit of heterotrimeric G proteins

Xin-Qiu Yao<sup>a,1</sup>, Rabia Malik<sup>b,e,1</sup>, Nicholas W. Griggs<sup>c</sup>, Lars Skjærven<sup>d</sup>, John R. Traynor<sup>c</sup>, Sivaraj Sivaramakrishnan<sup>e</sup>, and Barry J. Grant<sup>a,2</sup>

<sup>a</sup>Department of Computational Medicine and Bioinformatics, <sup>b</sup>Department of Cell and Developmental Biology, and <sup>c</sup>Department of Pharmacology, University of Michigan, Ann Arbor, Michigan, 48109 USA.

<sup>d</sup>Department of Biomedicine, University of Bergen, Norway.

<sup>e</sup>Department of Genetics, Cell Biology, and Development, University of Minnesota, Minneapolis, MN 55455, USA.

<sup>1</sup>Equal contributions

<sup>2</sup>Correspondence to B. J. Grant  
100 Washtenaw Ave.  
2017 Palmer Commons Bld.  
Ann Arbor, MI 48109-2218 USA  
Tel: 734-647-3113  
E-Mail: bjgrant@umich.edu

**Table S1. Analyzed crystallographic structures of G protein  $\alpha$  subunit.**

| <b>PDB ID</b> | <b>Chain</b> | <b>Ligand</b>     | <b>Source</b>            | <b>Resolution</b> | <b>Reference</b>            |
|---------------|--------------|-------------------|--------------------------|-------------------|-----------------------------|
| <b>1FQJ</b>   | A, D         | ALF, GDP, MG      | <i>Bos Taurus</i>        | 2                 | Slep et al. (2001)          |
| <b>1FQK</b>   | A, C         | ALF, GDP, MG      | <i>Bos Taurus</i>        | 2.3               | Slep et al. (2001)          |
| <b>1GOT</b>   | A            | MSE, GDP          | <i>Bos Taurus</i>        | 2                 | Lambright et al. (1996)     |
| <b>1TAD</b>   | A, B, C      | ALF, CA, CAC, GDP | <i>Bos Taurus</i>        | 1.7               | Sondek et al. (1994)        |
| <b>1TAG</b>   | A            | GDP, MG           | <i>Bos Taurus</i>        | 1.8               | Lambright et al. (1994)     |
| <b>1TND</b>   | A, B, C      | CAC, GSP, MG      | <i>Bos Taurus</i>        | 2.2               | Noel et al. (1993)          |
| <b>3V00</b>   | A, B, C      | GDP               | <i>Bos Taurus</i>        | 2.9               | Singh et al. (2012)         |
| <b>1AGR</b>   | A, D         | ALF, CIT, GDP, MG | <i>Rattus Norvegicus</i> | 2.8               | Tesmer et al. (1997)        |
| <b>1AS0</b>   | A            | GSP, MG, SO4      | <i>Rattus Norvegicus</i> | 2                 | Raw et al. (1997)           |
| <b>1AS2</b>   | A            | GDP, PO4          | <i>Rattus Norvegicus</i> | 2.8               | Raw et al. (1997)           |
| <b>1BH2</b>   | A            | GSP, MG           | <i>Rattus Norvegicus</i> | 2.1               | Posner et al. (1998)        |
| <b>1CIP</b>   | A            | GNP, MG           | <i>Rattus Norvegicus</i> | 1.5               | Coleman et al. (1999)       |
| <b>1GFI</b>   | A            | ALF, GDP, MG      | <i>Rattus Norvegicus</i> | 2.2               | Coleman et al. (1994)       |
| <b>1GG2</b>   | A            | GDP               | <i>Rattus Norvegicus</i> | 2.4               | Wall et al. Cell (1995)     |
| <b>1GIA</b>   | A            | GSP, MG           | <i>Rattus Norvegicus</i> | 2                 | Coleman et al. (1994)       |
| <b>1GIL</b>   | A            | GSP, MG           | <i>Rattus Norvegicus</i> | 2.3               | Coleman et al. (1994)       |
| <b>1GIT</b>   | A            | GDP, PO4          | <i>Rattus Norvegicus</i> | 2.6               | Berghuis et al. (1996)      |
| <b>1GP2</b>   | A            | GDP               | <i>Rattus Norvegicus</i> | 2.3               | Wall et al. (1995)          |
| <b>1KJY</b>   | A, C         | CS, GDP, MG       | <i>Homo Sapiens</i>      | 2.7               | Kimple et al. (2002)        |
| <b>1SVK</b>   | A            | ALF, GDP, MG      | <i>Rattus Norvegicus</i> | 2                 | Thomas et al. (2004)        |
| <b>1SVS</b>   | A            | GNP, MG           | <i>Rattus Norvegicus</i> | 1.5               | Thomas et al. (2004)        |
| <b>2GTP</b>   | B            | ALF, GDP, MG      | <i>Homo Sapiens</i>      | 2.5               | Soundararajan et al. (2008) |
| <b>2IHB</b>   | A            | ALF, GDP, MG      | <i>Homo Sapiens</i>      | 2.7               | Soundararajan et al. (2008) |
| <b>2ODE</b>   | A, C         | ALF, GDP, MG      | <i>Homo Sapiens</i>      | 1.9               | Soundararajan et al. (2008) |
| <b>2OM2</b>   | A, C         | GDP, MG           | <i>Homo Sapiens</i>      | 2.2               | Sammond et al. (2007)       |
| <b>2V4Z</b>   | A            | ALF, GDP, MG      | <i>Homo Sapiens</i>      | 2.8               | Kimple et al. (2009)        |
| <b>2XNS</b>   | A, B         | GDP, SRT,         | <i>Homo Sapiens</i>      | 3.4               | Sammond et al.              |

---

|             |      |                        |                          |     |                                              |
|-------------|------|------------------------|--------------------------|-----|----------------------------------------------|
| <b>2ZJY</b> | A    | SO4<br>ALF, GDP,<br>MG | <i>Rattus Norvegicus</i> | 2.8 | (2011)<br>Morikawa et al. To<br>be published |
| <b>3C7K</b> | C    | ALF, GDP,<br>MG        | <i>Mus Musculus</i>      | 2.9 | Slep et al. (2008)                           |
| <b>3FFA</b> | A    | GSP, MG, SO4           | <i>Rattus Norvegicus</i> | 2.3 | Kapoor et al.<br>(2009)                      |
| <b>3ONW</b> | A, B | GDP, SO4               | <i>Homo Sapiens</i>      | 2.4 | Bosch et al. (2011)                          |
| <b>3QE0</b> | B    | GDP, MG                | <i>Homo Sapiens</i>      | 3   | Bosch et al. (2012)                          |
| <b>3QI2</b> | A, B | GDP, GOL,<br>SO4       | <i>Homo Sapiens</i>      | 2.8 | Bosch et al. (2012)                          |
| <b>4G5O</b> | A, D | CIT, GDP, SO4          | <i>Homo Sapiens</i>      | 2.9 | Jia et al. To be<br>Published                |
| <b>4G5Q</b> | A, D | GDP, SO4, CIT          | <i>Homo Sapiens</i>      | 2.9 | Jia et al. To be<br>Published                |
| <b>4G5R</b> | A    | GDP, SO4, CIT          | <i>Homo Sapiens</i>      | 3.5 | Jia et al. To be<br>Published                |

---

**Table S2. Normalized node degeneracy from path analysis of correlation networks derived from MD simulations.** For each network, 500 suboptimal paths were calculated. Nodes with degeneracy  $\geq 0.1$  in one or more networks are shown and corresponding degeneracy values are colored in red, green and blue, respectively, for GTP, GDP and GDI state networks. Source and sink nodes are highlighted in gray.

*Paths from  $\alpha 5$  to  $\gamma$ -Pi binding site*

| SSE <sup>a</sup>     | $\beta 1$  |      |      |      | PL   |            | $\alpha 1$ | SI   | $\beta 2$ | $\beta 3$ |      |      |      |
|----------------------|------------|------|------|------|------|------------|------------|------|-----------|-----------|------|------|------|
| Residue              | K31        | L32  | L33  | L34  | K42  | S43        | T44        | T177 | T178      | I180      | R193 | M194 | F195 |
| GTP                  | 0.51       | 0.70 | 0.36 | 0.11 | 0.00 | 0.01       | 0.00       | 0.25 | 0.18      | 0.17      | 0.21 | 0.31 | 0.64 |
| GDP                  | 0.00       | 0.00 | 0.00 | 0.00 | 0.89 | 0.47       | 0.94       | 0.00 | 0.00      | 0.00      | 0.00 | 0.00 | 0.00 |
| GDI                  | 0.00       | 0.00 | 0.00 | 0.00 | 0.02 | 0.70       | 0.99       | 0.00 | 0.00      | 0.00      | 0.00 | 0.00 | 0.00 |
| Entropy <sup>b</sup> | 0.66       | 0.89 | 0.90 | 0.84 | 0.83 | 0.85       | 0.86       | 0.82 | 0.48      | 0.80      | 0.42 | 0.81 | 0.55 |
| SSE                  | SII        |      |      | L10  |      | $\alpha 5$ |            |      |           |           |      |      |      |
| Residue              | D196       | V197 | G198 | T323 | D324 | Q326       | N327       | V328 | K329      | F330      | V331 | F332 | D333 |
| GTP                  | 0.58       | 0.54 | 1.00 | 0.00 | 0.00 | 0.00       | 0.00       | 0.00 | 0.00      | 0.00      | 0.00 | 0.00 | 0.00 |
| GDP                  | 0.09       | 0.07 | 1.00 | 0.91 | 0.95 | 0.39       | 0.69       | 0.10 | 0.57      | 0.37      | 0.23 | 0.67 | 0.22 |
| GDI                  | 0.85       | 0.94 | 1.00 | 0.95 | 0.83 | 0.31       | 0.78       | 0.05 | 0.17      | 0.52      | 0.44 | 0.50 | 0.17 |
| Entropy              | 0.79       | 0.70 | 0.83 | 0.55 | 0.70 | 0.25       | 0.35       | 0.64 | 0.25      | 0.11      | 0.52 | 0.56 | 0.18 |
| SSE                  | $\alpha 5$ |      |      |      |      |            |            |      |           |           |      |      |      |
| Residue              | A334       | V335 | T336 | D337 | I338 | I339       |            |      |           |           |      |      |      |
| GTP                  | 0.00       | 0.00 | 0.00 | 0.00 | 0.00 | 1.00       |            |      |           |           |      |      |      |
| GDP                  | 0.05       | 0.49 | 0.67 | 0.15 | 0.52 | 1.00       |            |      |           |           |      |      |      |
| GDI                  | 0.20       | 0.34 | 0.60 | 0.05 | 0.15 | 1.00       |            |      |           |           |      |      |      |
| Entropy              | 0.18       | 0.69 | 0.24 | 0.49 | 0.34 | 0.74       |            |      |           |           |      |      |      |

*Paths from  $\beta 1$  to RasD-HD interface*

| SSE     | $\beta 1$ |      |      |      | PL   |      | $\alpha 1$ | LE   |      |           | $\alpha F$ |      |      |
|---------|-----------|------|------|------|------|------|------------|------|------|-----------|------------|------|------|
| Residue | K31       | L32  | L33  | L34  | K42  | S43  | T44        | K47  | N145 | D146      | S147       | L171 | R172 |
| GTP     | 1.00      | 0.37 | 0.31 | 0.06 | 0.02 | 0.19 | 0.00       | 0.00 | 0.00 | 1.00      | 0.00       | 0.00 | 0.02 |
| GDP     | 1.00      | 0.38 | 0.40 | 0.44 | 0.43 | 0.86 | 0.33       | 0.15 | 0.04 | 1.00      | 0.67       | 0.16 | 0.63 |
| GDI     | 1.00      | 0.10 | 0.14 | 0.11 | 0.00 | 0.00 | 0.00       | 0.00 | 1.00 | 1.00      | 0.00       | 0.00 | 0.00 |
| Entropy | 0.66      | 0.89 | 0.90 | 0.84 | 0.83 | 0.85 | 0.86       | 0.80 | 0.07 | 0.83      | 0.27       | 0.82 | 0.48 |
| SSE     | SI        |      |      |      |      |      | $\beta 2$  |      |      | $\beta 3$ |            |      |      |
| Residue | S173      | R174 | V175 | K176 | T177 | T178 | G179       | I180 | I181 | E182      | T183       | Q184 | N191 |
| GTP     | 0.00      | 1.00 | 0.67 | 0.57 | 0.69 | 0.16 | 0.00       | 0.06 | 0.00 | 0.00      | 0.00       | 0.00 | 0.00 |
| GDP     | 0.65      | 0.85 | 0.01 | 0.00 | 0.00 | 0.00 | 0.00       | 0.00 | 0.00 | 0.02      | 0.02       | 0.00 | 0.01 |
| GDI     | 0.00      | 1.00 | 0.81 | 0.57 | 1.00 | 0.68 | 0.65       | 0.51 | 0.39 | 0.36      | 0.31       | 0.18 | 0.16 |
| Entropy | 0.24      | 0.63 | 0.35 | 0.31 | 0.82 | 0.48 | 0.84       | 0.80 | 0.21 | 0.55      | 0.24       | 0.20 | 0.11 |
| SSE     | $\beta 3$ |      |      |      | SII  |      |            |      |      |           |            |      |      |

| Residue | F192 | R193 | M194 | F195 | D196 | V197 | G198 |
|---------|------|------|------|------|------|------|------|
| GTP     | 0.00 | 0.25 | 0.33 | 0.68 | 0.68 | 0.44 | 0.10 |
| GDP     | 0.08 | 0.34 | 0.29 | 0.40 | 0.46 | 0.01 | 0.00 |
| GDI     | 0.46 | 0.59 | 0.30 | 0.48 | 0.30 | 0.35 | 0.13 |
| Entropy | 0.61 | 0.42 | 0.81 | 0.55 | 0.79 | 0.70 | 0.83 |

*Paths from  $\alpha 5$  to RasD-HD interface*

| SSE     | $\beta 5$ | LG   | $\alpha G$ | L10  | $\alpha 5$ |      |      |      |      |      |      |      |      |
|---------|-----------|------|------------|------|------------|------|------|------|------|------|------|------|------|
| Residue | N265      | K266 | K267       | T320 | C321       | Q326 | N327 | V328 | K329 | F330 | V331 | F332 | D333 |
| GTP     | 0.11      | 1.00 | 0.13       | 0.34 | 0.63       | 0.03 | 0.96 | 0.21 | 0.36 | 0.40 | 0.49 | 0.41 | 0.50 |
| GDP     | 0.12      | 1.00 | 0.19       | 0.53 | 0.46       | 0.10 | 0.85 | 0.23 | 0.46 | 0.33 | 0.31 | 0.65 | 0.20 |
| GDI     | 0.19      | 1.00 | 0.06       | 0.26 | 0.74       | 0.08 | 0.95 | 0.10 | 0.18 | 0.48 | 0.46 | 0.48 | 0.21 |
| Entropy | 0.78      | 0.94 | 0.14       | 0.60 | 0.31       | 0.25 | 0.35 | 0.64 | 0.25 | 0.11 | 0.52 | 0.56 | 0.18 |

  

| SSE     | $\alpha 5$ |      |      |      |      |      |
|---------|------------|------|------|------|------|------|
| Residue | A334       | V335 | T336 | D337 | I338 | I339 |
| GTP     | 0.36       | 0.19 | 0.37 | 0.38 | 0.79 | 1.00 |
| GDP     | 0.06       | 0.50 | 0.65 | 0.18 | 0.56 | 1.00 |
| GDI     | 0.24       | 0.39 | 0.52 | 0.14 | 0.24 | 1.00 |
| Entropy | 0.18       | 0.69 | 0.24 | 0.49 | 0.34 | 0.74 |

<sup>a</sup>SSE, secondary structure element.

<sup>b</sup>Entropy, sequence conservation (similar to the definition in (1)) derived from PFAM (2) “seed” alignment with accession number PF00503. Entries  $\geq 0.7$  are designated as highly conserved and are highlighted in yellow.

### Supplemental References

- Grant, B. J., McCammon, J. A., Caves, L. S. D., and Cross, R. A. (2007) Multivariate analysis of conserved sequence-structure relationships in kinesins: coupling of the active site and a tubulin-binding sub-domain. *J Mol Biol* **368**, 1231-1248
- Finn, R. D., Bateman, A., Clements, J., Coghill, P., Eberhardt, R. Y., Eddy, S. R., Heger, A., Hetherington, K., Holm, L., Mistry, J., Sonnhammer, E. L. L., Tate, J., and Punta, M. (2014) Pfam: The protein families database. *Nucleic Acids Res* **42**, D222-D230
